# Supplementary material for: Determination of Anthelmintic and Antiprotozoal Drug Residues in Fish Using Liquid Chromatography-Tandem Mass Spectrometry
Source: MDPI journal article supplement (doi:10.3390/molecules26092575), 2021-04-28
Supplement: s1 [file s1]

Supplementary Material

# Determination of Anthelmintic and Antiprotozoal Drug Residues in Fish Using Liquid Chromatography-Tandem Mass Spectrometry

Eunjung Kim <sup>1,2,†</sup>, Sihyun Park <sup>1,†</sup>, Hyunjin Park <sup>1</sup>, Jangduck Choi <sup>1</sup>, Hae-Jung Yoon <sup>1</sup> and Jeong-Han Kim <sup>2,\*</sup>

<sup>1</sup> Pesticide and Veterinary Drug Residues Division, National Institute of Food and Drug Safety Evaluation, Ministry of Food and Drug Safety, Osong, Cheongju, Chungcheongbuk-do, 28159, Korea; ejkim81@korea.kr (E.K.); sihyun11111@korea.kr (S.P.); hj77park@korea.kr (H.P.); cjd5388@korea.kr (J.C.); hjyoon@korea.kr (H.-J.Y.)

<sup>2</sup> Pesticide Chemistry and Toxicology Laboratory, Department of Agricultural Biotechnology and Research Institute of Agriculture and Life Sciences, Seoul National University, Seoul, 08826, Korea

\* Correspondence: kjh2404@snu.ac.kr; Tel.: +82-2-880-4644

† These authors contributed equally to this work.

**Table S1.** LC-MS/MS parameters of 71 compounds.

| Class        | Compounds                   | ESI (+/−) | Molecular weight (m/z) | Precursor ion (m/z) | <sup>a</sup> Product ion (m/z) | Collision Energy (eV) | Retention time (min) |
|--------------|-----------------------------|-----------|------------------------|---------------------|--------------------------------|-----------------------|----------------------|
| Anthelmintic | Abamectin                   | +         | 872.5                  | 895.0               | <u>449.3</u>                   | 20                    | 13.76                |
|              |                             |           |                        |                     | 327.3                          | 20                    |                      |
|              |                             |           |                        |                     | 751.4                          | 20                    |                      |
|              | Albendazole                 | +         | 265.1                  | 266.0               | <u>234.0</u>                   | 20                    | 8.00                 |
|              |                             |           |                        |                     | 191.1                          | 20                    |                      |
|              |                             |           |                        |                     | 159.2                          | 20                    |                      |
|              | Albendazole sulfoxide       | +         | 281.1                  | 282.0               | <u>208.1</u>                   | 16                    | 5.12                 |
|              |                             |           |                        |                     | 240.1                          | 19                    |                      |
|              |                             |           |                        |                     | 159.2                          | 19                    |                      |
|              | Albendazole sulfone         | +         | 297.1                  | 298.0               | <u>159.2</u>                   | 20                    | 6.19                 |
|              |                             |           |                        |                     | 224.1                          | 20                    |                      |
|              |                             |           |                        |                     | 266.1                          | 20                    |                      |
|              | 2-Amino albendazole sulfone | +         | 239.1                  | 240.0               | <u>133.2</u>                   | 17                    | 2.84                 |
|              |                             |           |                        |                     | 198.2                          | 16                    |                      |
|              |                             |           |                        |                     | 105.2                          | 30                    |                      |
|              | Benznidazole                | +         | 260.1                  | 261.0               | <u>91.2</u>                    | 20                    | 6.51                 |
|              |                             |           |                        |                     | 107.3                          | 18                    |                      |
|              |                             |           |                        |                     | 65.3                           | 17                    |                      |
|              | Bithionol                   | −         | 353.9                  | 352.0               | <u>161.1</u>                   | −25                   | 12.43                |
|              |                             |           |                        |                     | 192.0                          | −25                   |                      |
|              |                             |           |                        |                     | 125.1                          | −42                   |                      |
|              | Carbendazim                 | +         | 191.1                  | 192.0               | <u>132.2</u>                   | 20                    | 2.78                 |
|              |                             |           |                        |                     | 105.2                          | 30                    |                      |
|              |                             |           |                        |                     | 160.1                          | 30                    |                      |
|              | Carnidazole                 | +         | 244.1                  | 245.0               | <u>118.2</u>                   | 30                    | 6.51                 |
|              |                             |           |                        |                     | 75.2                           | 14                    |                      |
|              |                             |           |                        |                     | 47.2                           | 26                    |                      |
|              | Clorsulon                   | −         | 378.9                  | 377.0               | <u>342.1</u>                   | −14                   | 6.87                 |
|              |                             |           |                        |                     | 242.0                          | −24                   |                      |

|                          |   |       |       |              |     |       |
|--------------------------|---|-------|-------|--------------|-----|-------|
|                          |   |       |       | 142.2        | -29 |       |
|                          |   |       |       | <u>126.9</u> | -32 |       |
| Closantel                | - | 661.9 | 660.0 | 315.1        | -34 | 13.87 |
|                          |   |       |       | 344.9        | -24 |       |
|                          |   |       |       | <u>171.2</u> | 15  |       |
| Cymiazole                | + | 218.1 | 219.0 | 144.1        | 20  | 12.68 |
|                          |   |       |       | 77.3         | 23  |       |
|                          |   |       |       | <u>100.0</u> | 20  |       |
| Diethylcarbamazine       | + | 199.2 | 200.0 | 72.0         | 20  | 1.79  |
|                          |   |       |       | 44.2         | 20  |       |
|                          |   |       |       | <u>777.4</u> | 36  |       |
| Doramectin               | + | 898.5 | 921.0 | 449.3        | 34  | 14.38 |
|                          |   |       |       | 353.3        | 34  |       |
|                          |   |       |       | <u>158.1</u> | 30  |       |
| Emamectin                | + | 885.5 | 886.0 | 82.2         | 34  | 10.98 |
|                          |   |       |       | 159.2        | 32  |       |
|                          |   |       |       | <u>325.2</u> | 13  |       |
| Febantel                 | + | 446.1 | 447.0 | 93.2         | 25  | 10.50 |
|                          |   |       |       | 384.1        | 16  |       |
|                          |   |       |       | <u>416.2</u> | 17  |       |
| Fenbendazole             | + | 299.1 | 300.0 | 281.2        | 30  | 8.90  |
|                          |   |       |       | 268.0        | 20  |       |
|                          |   |       |       | <u>95.2</u>  | 17  |       |
| Fluazuron                | + | 505.0 | 506.0 | 75.3         | 30  | 12.50 |
|                          |   |       |       | 141.2        | 34  |       |
|                          |   |       |       | <u>83.3</u>  | 22  |       |
| Flubendazole             | + | 313.1 | 314.0 | 203.0        | 22  | 7.90  |
|                          |   |       |       | 282.1        | 34  |       |
|                          |   |       |       | <u>123.2</u> | 34  |       |
| 2-Amino flubendazole     | + | 255.1 | 256.0 | 95.2         | 34  | 6.00  |
|                          |   |       |       | 123.2        | 17  |       |
|                          |   |       |       | <u>753.4</u> | 40  |       |
| Ivermectin               | + | 874.5 | 897.0 | 329.3        | 34  | 15.62 |
|                          |   |       |       | 609.3        | 24  |       |
|                          |   |       |       | <u>91.0</u>  | 20  |       |
| Levamisole               | + | 204.1 | 205.0 | 123.1        | 20  | 2.91  |
|                          |   |       |       | 178.0        | 20  |       |
|                          |   |       |       | <u>264.0</u> | 20  |       |
| Mebendazole              | + | 295.1 | 296.0 | 105.2        | 30  | 7.55  |
|                          |   |       |       | 77.2         | 20  |       |
|                          |   |       |       | <u>105.2</u> | 16  |       |
| Mebendazole amine        | + | 237.1 | 238.0 | 133.3        | 30  | 5.71  |
|                          |   |       |       | 77.2         | 16  |       |
|                          |   |       |       | <u>266.0</u> | 20  |       |
| 5-Hydroxy<br>mebendazole | + | 297.1 | 298.0 | 79.2         | 20  | 5.88  |
|                          |   |       |       | 160.2        | 20  |       |
|                          |   |       |       | <u>186.0</u> | -20 |       |
| Monepantel               | - | 473.1 | 472.0 | 166.2        | -23 | 11.57 |
|                          |   |       |       | 146.2        | -14 |       |
|                          |   |       |       | <u>186.0</u> | -30 |       |
| Monepantel sulfone       | - | 505.1 | 504.0 | 166.1        | -24 | 11.05 |
|                          |   |       |       | 146.1        | -24 |       |

|                            |   |       |       |                     |     |       |
|----------------------------|---|-------|-------|---------------------|-----|-------|
|                            |   |       |       | <b><u>123.0</u></b> | 20  |       |
| Morantel                   | + | 220.1 | 221.0 | 164.0               | 20  | 5.58  |
|                            |   |       |       | 111.0               | 21  |       |
|                            |   |       |       | <b><u>171.1</u></b> | -20 |       |
| Niclosamide                | - | 326.0 | 325.0 | 289.0               | -18 | 11.22 |
|                            |   |       |       | 135.1               | -21 |       |
|                            |   |       |       | <b><u>127.0</u></b> | -14 |       |
| Nitroxinil                 | - | 289.9 | 288.0 | 162.1               | -28 | 7.79  |
|                            |   |       |       | 116.1               | -20 |       |
|                            |   |       |       | <b><u>82.3</u></b>  | 20  |       |
| Ornidazole                 | + | 219.0 | 220.0 | 128.2               | 10  | 5.29  |
|                            |   |       |       | 42.2                | 10  |       |
|                            |   |       |       | <b><u>221.1</u></b> | 20  |       |
| Oxamniquine                | + | 279.2 | 280.0 | 174.2               | 20  | 3.16  |
|                            |   |       |       | 60.3                | 20  |       |
|                            |   |       |       | <b><u>91.1</u></b>  | 20  |       |
| Oxantel                    | + | 216.1 | 217.0 | 118.3               | 20  | 3.08  |
|                            |   |       |       | 131.3               | 29  |       |
|                            |   |       |       | <b><u>159.2</u></b> | 19  |       |
| Oxfendazole                | + | 315.1 | 316.0 | 284.2               | 21  | 6.23  |
|                            |   |       |       | 191.2               | 21  |       |
|                            |   |       |       | <b><u>300.1</u></b> | 19  |       |
| Oxfendazole sulfone        | + | 331.1 | 332.0 | 159.2               | 12  | 7.23  |
|                            |   |       |       | 131.3               | 12  |       |
|                            |   |       |       | <b><u>176.0</u></b> | 20  |       |
| Oxibendazole               | + | 249.1 | 250.0 | 218.0               | 20  | 6.57  |
|                            |   |       |       | 148.2               | 18  |       |
|                            |   |       |       | <b><u>362.0</u></b> | -19 |       |
| Oxyclozanide               | - | 398.9 | 397.0 | 202.0               | -24 | 11.08 |
|                            |   |       |       | 176.2               | -27 |       |
|                            |   |       |       | <b><u>159.0</u></b> | 20  |       |
| Praziquantel               | + | 312.2 | 313.0 | 131.3               | 21  | 8.97  |
|                            |   |       |       | 174.2               | 19  |       |
|                            |   |       |       | <b><u>158.2</u></b> | 34  |       |
| Pyrantel                   | + | 206.1 | 207.0 | 351.1               | 34  | 4.25  |
|                            |   |       |       | 109.0               | 20  |       |
|                            |   |       |       | <b><u>82.2</u></b>  | 30  |       |
| Ternidazole                | + | 185.1 | 186.0 | 128.2               | 12  | 2.87  |
|                            |   |       |       | 42.2                | 12  |       |
|                            |   |       |       | <b><u>178.0</u></b> | 20  |       |
| Tetramisole                | + | 204.1 | 205.0 | 91.0                | 20  | 2.91  |
|                            |   |       |       | 123.1               | 20  |       |
|                            |   |       |       | <b><u>121.2</u></b> | 19  |       |
| Thiabendazole              | + | 201.0 | 202.0 | 175.0               | 20  | 3.20  |
|                            |   |       |       |                     |     |       |
|                            |   |       |       | <b><u>131.0</u></b> | 20  |       |
| 5-Hydroxy<br>thiabendazole | + | 217.0 | 218.0 | 65.2                | 26  | 1.92  |
|                            |   |       |       | 191.1               | 16  |       |
|                            |   |       |       | <b><u>147.2</u></b> | 16  |       |
| Thiophanate                | + | 370.1 | 371.0 | 81.3                | 15  | 9.11  |
|                            |   |       |       | 151.0               | 20  |       |
| Trichlorfon                | + | 255.9 | 256.0 | <b><u>109.2</u></b> | 17  | 5.28  |

|               |                                |   |       |       |              |     |       |
|---------------|--------------------------------|---|-------|-------|--------------|-----|-------|
|               |                                |   |       |       | 221.1        | 11  |       |
|               |                                |   |       |       | 113.0        | 31  |       |
|               |                                |   |       |       | <b>273.9</b> | 35  |       |
|               | Triclabendazole                | + | 358.0 | 359.0 | 343.9        | 30  | 10.99 |
|               |                                |   |       |       | 171.1        | 53  |       |
|               |                                |   |       |       | <b>182.1</b> | -25 |       |
|               | Keto triclabendazole           | - | 328.0 | 326.9 | 146.1        | -34 | 9.63  |
|               |                                |   |       |       | 118.0        | -40 |       |
|               |                                |   |       |       | <b>142.9</b> | 20  |       |
| Antiprotozoal | Arprinocid                     | + | 277.1 | 278.0 | 107.2        | 16  | 6.01  |
|               |                                |   |       |       | 108.2        | 19  |       |
|               |                                |   |       |       | <b>150.0</b> | 20  |       |
|               | Amprolium                      | + | 278.1 | 243.0 | 122.1        | 20  | 1.07  |
|               |                                |   |       |       | 94.1         | 22  |       |
|               |                                |   |       |       | <b>186.1</b> | -30 |       |
|               | Buparvaquone                   | - | 326.2 | 325.0 | 297.3        | -21 | 14.47 |
|               |                                |   |       |       | 187.2        | -12 |       |
|               |                                |   |       |       | <b>204.0</b> | 20  |       |
|               | Buquinolate                    | + | 361.2 | 362.0 | 316.1        | 21  | 10.05 |
|               |                                |   |       |       | 148.2        | 25  |       |
|               |                                |   |       |       | <b>217.0</b> | 20  |       |
|               | Cambendazole                   | + | 302.1 | 303.0 | 261.0        | 20  | 6.15  |
|               |                                |   |       |       | 190.1        | 24  |       |
|               |                                |   |       |       | <b>101.2</b> | 26  |       |
|               | Clopidol                       | + | 191.0 | 192.0 | 110.2        | 12  | 2.34  |
|               |                                |   |       |       | 128.2        | 26  |       |
|               |                                |   |       |       | <b>372.1</b> | 20  |       |
|               | Decoquinate                    | + | 417.3 | 418.0 | 204.1        | 27  | 12.68 |
|               |                                |   |       |       | 232.2        | 15  |       |
|               |                                |   |       |       | <b>123.1</b> | 20  |       |
|               | Diaveridine                    | + | 260.1 | 261.0 | 81.3         | 20  | 2.84  |
|               |                                |   |       |       | 245.0        | 19  |       |
|               |                                |   |       |       | <b>334.1</b> | -26 |       |
|               | Diclazuril                     | - | 406.0 | 405.0 | 335.1        | -28 | 10.49 |
|               |                                |   |       |       | <b>41.2</b>  | 14  |       |
|               | Dicyclanil                     | + | 190.1 | 191.0 | 150.3        | 14  | 0.56  |
|               |                                |   |       |       | 109.2        | 13  |       |
|               |                                |   |       |       | <b>136.1</b> | 20  |       |
|               | Ethodpabate                    | + | 237.1 | 238.0 | 80.2         | 20  | 6.81  |
|               |                                |   |       |       | 206.0        | 27  |       |
|               |                                |   |       |       | <b>136.0</b> | 20  |       |
|               | Halofuginone                   | + | 413.0 | 414.0 | 150.0        | 20  | 6.19  |
|               |                                |   |       |       | 100.2        | 29  |       |
|               |                                |   |       |       | <b>188.2</b> | 20  |       |
|               | Imidocab                       | + | 348.2 | 349.0 | 162.2        | 13  | 1.54  |
|               |                                |   |       |       | 97.7         | 24  |       |
|               |                                |   |       |       | <b>393.4</b> | 22  |       |
|               | Maduramycin                    | + | 916.5 | 935.0 | 647.5        | 26  | 16.85 |
|               |                                |   |       |       | 629.4        | 22  |       |
|               | Methylbenzoquate,<br>Nequinate | + | 365.2 | 366.0 | <b>334.1</b> | 20  | 9.88  |
|               |                                |   |       |       | 91.0         | 22  |       |

|  |                     |   |       |       |                     |     |       |
|--|---------------------|---|-------|-------|---------------------|-----|-------|
|  |                     |   |       |       | 201.1               | 26  |       |
|  |                     |   |       |       | <b><u>82.2</u></b>  | 12  |       |
|  | Metronidazole       | + | 171.1 | 172.0 | 42.1                | 12  | 2.28  |
|  |                     |   |       |       | 128.2               | 11  |       |
|  |                     |   |       |       | <b><u>675.4</u></b> | 24  |       |
|  | Monensin            | + | 692.4 | 693.0 | 461.4               | 24  | 16.60 |
|  |                     |   |       |       | 479.3               | 24  |       |
|  |                     |   |       |       | <b><u>531.4</u></b> | 36  |       |
|  | Narasin             | + | 764.5 | 787.0 | 431.3               | 30  | 17.32 |
|  |                     |   |       |       | 769.5               | 30  |       |
|  |                     |   |       |       | <b><u>136.9</u></b> | -20 |       |
|  | Nicarbazin          | - | 302.1 | 301.0 | 107.1               | -30 | 9.74  |
|  |                     |   |       |       | 46.0                | -20 |       |
|  |                     |   |       |       | <b><u>432.3</u></b> | 28  |       |
|  | Salinomycin         | + | 772.5 | 773.0 | 431.3               | 28  | 16.13 |
|  |                     |   |       |       | 532.3               | 28  |       |
|  |                     |   |       |       | <b><u>629.4</u></b> | 34  |       |
|  | Semduramicin        | + | 872.5 | 890.0 | 647.4               | 20  | 14.49 |
|  |                     |   |       |       | 727.5               | 34  |       |
|  |                     |   |       |       | <b><u>128.2</u></b> | 11  |       |
|  | Tinidazole          | + | 247.1 | 248.0 | 82.2                | 11  | 4.30  |
|  |                     |   |       |       | 121.2               | 19  |       |
|  |                     |   |       |       | <b><u>41.8</u></b>  | -22 |       |
|  | Toltrazuril sulfone | - | 457.1 | 456.0 | 399.1               | -22 | 9.96  |
|  |                     |   |       |       |                     |     |       |
|  |                     |   |       |       | <b><u>42.1</u></b>  | -15 |       |
|  | Zoalene             | - | 225.0 | 224.0 | 77.1                | -27 | 6.12  |
|  |                     |   |       |       | 181.1               | -23 |       |

<sup>a</sup> The bold underlined text expressed as quantification ion.

**Table S2.** Linearity, matrix effects and LOQs of 71 compounds.

| No. | Compound                    | Flatfish                    |                     |                                         | Eel                         |                     |                                         | Shrimp                      |                     |                                         |
|-----|-----------------------------|-----------------------------|---------------------|-----------------------------------------|-----------------------------|---------------------|-----------------------------------------|-----------------------------|---------------------|-----------------------------------------|
|     |                             | Linearity (R <sup>2</sup> ) | ME <sup>a</sup> (%) | LOQ <sup>b</sup> (µg kg <sup>-1</sup> ) | Linearity (R <sup>2</sup> ) | ME <sup>a</sup> (%) | LOQ <sup>b</sup> (µg kg <sup>-1</sup> ) | Linearity (R <sup>2</sup> ) | ME <sup>a</sup> (%) | LOQ <sup>b</sup> (µg kg <sup>-1</sup> ) |
| 1   | Abamectin                   | 0.9962                      | -17.8               | 0.3                                     | 0.9967                      | 1.1                 | 0.3                                     | 0.9872                      | 47.0                | 0.2                                     |
| 2   | Albendazole                 | 0.9826                      | -55.8               | 0.02                                    | 0.9826                      | -45.0               | 0.1                                     | 0.9921                      | -10.7               | 0.1                                     |
| 3   | Albendazole sulfoxide       | 0.9969                      | -10.4               | 0.1                                     | 0.9952                      | 3.9                 | 0.1                                     | 0.9992                      | -11.0               | 0.2                                     |
| 4   | Albendazole sulfone         | 0.9992                      | -38.3               | 0.1                                     | 0.9957                      | -45.7               | 0.1                                     | 0.9954                      | -20.6               | 0.1                                     |
| 5   | 2-Amino albendazole sulfone | 0.9992                      | -22.9               | 0.3                                     | 0.9983                      | -30.9               | 0.4                                     | 0.9978                      | -19.8               | 0.1                                     |
| 6   | Arprinocid                  | 0.9997                      | -54.0               | 0.2                                     | 0.9996                      | -19.2               | 0.2                                     | 0.9993                      | -19.8               | 0.2                                     |
| 7   | Amprolium                   | 0.9855                      | -92.7               | 1.8                                     | 0.9946                      | -83.6               | 3.6                                     | 0.9945                      | -94.9               | 3.9                                     |
| 8   | Benznidazole                | 0.9994                      | -42.3               | 1.7                                     | 0.9995                      | -0.1                | 0.8                                     | 0.9972                      | -11.4               | 0.3                                     |
| 9   | Bithionol                   | 0.9916                      | -60.3               | 0.4                                     | 0.9871                      | -71.0               | 0.2                                     | 0.9963                      | -47.6               | 0.2                                     |
| 10  | Buparvaquone                | 0.9984                      | -76.5               | 0.1                                     | 0.9810                      | -83.6               | 0.5                                     | 0.9897                      | -62.6               | 0.2                                     |
| 11  | Buquinolate                 | 0.9916                      | -47.6               | 0.02                                    | 0.9927                      | -65.8               | 0.3                                     | 0.9983                      | -19.5               | 0.1                                     |
| 12  | Cambendazole                | 0.9996                      | -38.6               | 0.1                                     | 0.9972                      | -19.8               | 0.3                                     | 0.9965                      | -6.7                | 0.1                                     |
| 13  | Carbendazim                 | 0.9998                      | -61.3               | 0.6                                     | 0.9988                      | -27.1               | 0.7                                     | 0.9993                      | -37.0               | 0.7                                     |
| 14  | Carnidazole                 | 0.9953                      | -43.9               | 1.2                                     | 0.9992                      | -23.4               | 1.2                                     | 0.9983                      | -2.2                | 1.2                                     |

|    |                               |        |       |      |        |       |      |        |       |      |
|----|-------------------------------|--------|-------|------|--------|-------|------|--------|-------|------|
| 15 | Clopidol                      | 0.9962 | -59.3 | 0.2  | 0.9972 | -18.5 | 0.2  | 0.9997 | -33.5 | 0.1  |
| 16 | Clorsulon                     | 0.9983 | -24.1 | 3.3  | 0.9833 | -4.9  | 2.7  | 0.9983 | -22.9 | 2.6  |
| 17 | Closantel                     | 0.9880 | -51.1 | 0.1  | 0.9840 | -52.6 | 0.03 | 0.9853 | -93.3 | 0.1  |
| 18 | Cymiazole                     | 0.9938 | -52.0 | 0.5  | 0.9989 | -38.3 | 0.1  | 0.9983 | -23.3 | 2.2  |
| 19 | Decoquinate                   | 0.9931 | -73.6 | 0.1  | 0.9987 | -95.5 | 0.1  | 0.9949 | -37.9 | 0.1  |
| 20 | Diaveridine                   | 0.9972 | -28.8 | 0.3  | 0.9991 | -15.8 | 0.4  | 0.9954 | -22.5 | 0.5  |
| 21 | Diclazuril                    | 0.9893 | -53.5 | 0.2  | 0.9994 | -39.1 | 0.1  | 0.9902 | -23.0 | 0.1  |
| 22 | Dicyclanil                    | 0.9953 | -86.3 | 3.9  | 0.9929 | -70.2 | 2.9  | 0.9949 | -61.7 | 4.3  |
| 23 | Diethylcarbamazine            | 0.9878 | -87.2 | 0.2  | 0.9931 | -41.7 | 0.5  | 0.9983 | -91.7 | 1.2  |
| 24 | Doramectin                    | 0.9946 | -33.9 | 0.2  | 0.9976 | 98.4  | 0.03 | 0.9871 | 55.7  | 0.3  |
| 25 | Enamectin                     | 0.9803 | -66.5 | 0.3  | 0.9948 | -34.7 | 0.3  | 0.9986 | -19.4 | 0.1  |
| 26 | Ethopabate                    | 0.9999 | -44.6 | 0.1  | 0.9988 | -1.0  | 0.2  | 0.9984 | -5.5  | 0.1  |
| 27 | Febantel                      | 0.9938 | -55.3 | 0.2  | 0.9973 | -27.6 | 0.1  | 0.9992 | -11.8 | 0.1  |
| 28 | Fenbendazole                  | 0.9846 | -72.0 | 0.5  | 0.9978 | -52.4 | 0.5  | 0.9920 | -32.8 | 0.3  |
| 29 | Fluazuron                     | 0.9983 | -80.9 | 0.4  | 0.9956 | -74.7 | 0.7  | 0.9960 | -97.4 | 0.2  |
| 30 | Flubendazole                  | 0.9984 | -44.6 | 0.1  | 0.9996 | -13.3 | 0.1  | 0.9965 | -4.9  | 0.1  |
| 31 | 2-Amino flubendazole          | 0.9894 | -56.8 | 0.2  | 0.9918 | -61.6 | 0.2  | 0.9988 | -18.0 | 0.2  |
| 32 | Halofuginone                  | 0.9970 | -58.7 | 0.1  | 0.9893 | -30.0 | 0.1  | 0.9959 | -30.6 | 0.2  |
| 33 | Imidocarb                     | 0.9881 | -82.8 | 1.6  | 0.9941 | -37.6 | 0.6  | 0.9907 | -84.3 | 2.5  |
| 34 | Ivermectin                    | 0.9840 | -49.7 | 1.0  | 0.9972 | -35.4 | 0.5  | 0.9966 | 31.4  | 3.0  |
| 35 | Levamisole                    | 0.9992 | -44.0 | 0.4  | 0.9863 | -24.2 | 0.4  | 0.9997 | -31.4 | 2.1  |
| 36 | Maduramycin                   | 0.9992 | -68.9 | 0.5  | 0.9846 | -56.4 | 0.4  | 0.9972 | -24.6 | 0.1  |
| 37 | Mebendazole                   | 0.9986 | -48.3 | 0.04 | 0.9952 | -6.4  | 0.1  | 0.9970 | 29.8  | 0.2  |
| 38 | Mebendazole amine             | 0.9978 | -48.3 | 0.3  | 0.9952 | -38.5 | 0.3  | 0.9983 | -22.5 | 0.1  |
| 39 | 5-Hydroxy mebendazole         | 0.9995 | -44.6 | 0.9  | 0.9986 | -45.9 | 0.9  | 0.9991 | -3.1  | 1.1  |
| 40 | Methylbenzoquate,<br>Nequinat | 0.9993 | -60.0 | 0.1  | 0.9961 | -79.0 | 0.1  | 0.9997 | -13.0 | 0.1  |
| 41 | Metronidazole                 | 0.9942 | -54.5 | 0.3  | 0.9977 | -28.0 | 0.2  | 0.9995 | -48.7 | 0.5  |
| 42 | Monensin                      | 0.9874 | -53.4 | 0.7  | 0.9866 | -55.9 | 0.2  | 0.9951 | -29.0 | 0.1  |
| 43 | Monepantel                    | 0.9871 | 92.4  | 0.3  | 0.9985 | 106.4 | 0.1  | 0.9966 | 25.5  | 0.1  |
| 44 | Monepantel-sulfone            | 0.9884 | 49.7  | 0.2  | 0.9910 | 108.7 | 0.1  | 0.9876 | 22.1  | 0.04 |
| 45 | Morantel                      | 0.9997 | -34.8 | 0.3  | 0.9989 | -3.0  | 0.9  | 0.9997 | -14.8 | 0.4  |
| 46 | Narasin                       | 0.9911 | -75.4 | 0.3  | 0.9914 | -80.1 | 0.4  | 0.9982 | -48.2 | 0.2  |
| 47 | Nicarbazin                    | 0.9862 | -30.7 | 0.2  | 0.9911 | -36.4 | 0.1  | 0.9952 | -15.9 | 0.2  |
| 48 | Niclosamide                   | 0.9990 | -47.6 | 0.2  | 0.9833 | -57.4 | 0.1  | 0.9995 | -56.0 | 0.1  |
| 49 | Nitroxinil                    | 0.9907 | -37.7 | 0.1  | 0.9883 | -7.0  | 0.2  | 0.9806 | -5.8  | 0.1  |
| 50 | Ornidazole                    | 0.9985 | -44.4 | 0.4  | 0.9997 | -18.2 | 0.6  | 0.9958 | -9.8  | 0.3  |
| 51 | Oxamniquine                   | 0.9988 | -60.5 | 0.1  | 0.9991 | -15.8 | 0.8  | 0.9996 | -31.5 | 0.8  |
| 52 | Oxantel                       | 0.9982 | -30.2 | 0.5  | 0.9985 | -10.3 | 0.3  | 0.9992 | -13.0 | 0.1  |
| 53 | Oxfendazole                   | 0.9988 | -33.0 | 3.6  | 0.9998 | -7.7  | 4.3  | 0.9971 | -13.1 | 2.4  |
| 54 | Oxfendazole sulfone           | 0.9979 | -23.1 | 0.1  | 0.9963 | -0.1  | 0.03 | 0.9987 | -4.3  | 0.1  |
| 55 | Oxibendazole                  | 0.9929 | -37.9 | 1.2  | 0.9971 | -32.8 | 0.5  | 0.9989 | -18.1 | 1.2  |
| 56 | Oxyclozanide                  | 0.9837 | -10.2 | 1.8  | 0.9919 | -15.9 | 1.5  | 0.9857 | -11.7 | 1.0  |

|    |                         |        |       |     |        |       |     |        |       |     |
|----|-------------------------|--------|-------|-----|--------|-------|-----|--------|-------|-----|
| 57 | Praziquantel            | 0.9972 | -46.0 | 0.1 | 0.9995 | -8.2  | 0.2 | 0.9994 | -1.3  | 0.2 |
| 58 | Pyrantel                | 0.9999 | -29.8 | 0.2 | 0.9994 | -7.0  | 0.2 | 0.9999 | -11.7 | 0.2 |
| 59 | Salinomycin             | 0.9930 | -74.1 | 0.1 | 0.9981 | -72.2 | 0.1 | 0.9974 | -48.9 | 0.1 |
| 60 | Semduramicin            | 0.9894 | -37.8 | 0.5 | 0.9850 | -45.5 | 0.2 | 0.9966 | 9.7   | 0.1 |
| 61 | Ternidazole             | 0.9955 | -57.0 | 1.4 | 0.9967 | -14.1 | 0.7 | 0.9976 | -22.7 | 1.2 |
| 62 | Tetramisole             | 0.9998 | -36.4 | 0.2 | 0.9988 | -22.3 | 0.3 | 0.9964 | -36.0 | 0.2 |
| 63 | Thiabendazole           | 0.9940 | -44.2 | 0.1 | 0.9944 | -17.8 | 0.1 | 0.9949 | -29.8 | 0.1 |
| 64 | 5-Hydroxy thiabendazole | 0.9983 | -78.8 | 0.1 | 0.9982 | -80.1 | 0.2 | 0.9997 | -76.7 | 0.1 |
| 65 | Thiophanate             | 0.9893 | -71.1 | 0.2 | 0.9982 | -63.6 | 0.1 | 0.9987 | -44.7 | 0.1 |
| 66 | Tinidazole              | 0.9956 | -34.7 | 2.1 | 0.9966 | -25.8 | 2.1 | 0.9936 | -29.6 | 1.9 |
| 67 | Toltrazuril sulfone     | 0.9963 | -32.6 | 0.1 | 0.9991 | -11.7 | 0.1 | 0.9992 | -4.4  | 0.4 |
| 68 | Trichlorfon             | 0.9879 | -67.3 | 1.6 | 0.9964 | -17.0 | 0.6 | 0.9951 | 24.4  | 1.5 |
| 69 | Triclabendazole         | 0.9994 | -79.5 | 0.2 | 0.9968 | -68.5 | 0.7 | 0.9974 | -35.4 | 0.3 |
| 70 | Keto triclabendazole    | 0.9990 | -57.7 | 0.4 | 0.9846 | -58.6 | 0.3 | 0.9944 | -17.9 | 0.2 |
| 71 | Zoalene                 | 0.9981 | -16.8 | 0.3 | 0.9948 | -4.2  | 0.3 | 0.9879 | -12.8 | 0.3 |

<sup>a</sup>Matrix effects, <sup>b</sup> Limit of quantitation.

**Table S3.** Validation results for the analytical method of 71 compounds in 4 kinds of food matrices ( $n=5$ ).

| No. | Compound                    | Recovery (CV <sup>a</sup> ), % |                 |                 |                 |                 |                 |                 |                 |                 |                 |                 |                 |
|-----|-----------------------------|--------------------------------|-----------------|-----------------|-----------------|-----------------|-----------------|-----------------|-----------------|-----------------|-----------------|-----------------|-----------------|
|     |                             | Flatfish                       |                 |                 | Eel             |                 |                 | Shrimp          |                 |                 | Manila clam     |                 |                 |
|     |                             | C1 <sup>b</sup>                | C2 <sup>b</sup> | C3 <sup>b</sup> | C1 <sup>b</sup> | C2 <sup>b</sup> | C3 <sup>b</sup> | C1 <sup>b</sup> | C2 <sup>b</sup> | C3 <sup>b</sup> | C1 <sup>b</sup> | C2 <sup>b</sup> | C3 <sup>b</sup> |
| 1   | Abamectin                   | 112.2<br>(20.5)                | 104.6<br>(11.1) | 99.8<br>(13.4)  | 77.9<br>(21.4)  | 109.0<br>(19.7) | 103.7<br>(5.4)  | 103.0<br>(15.2) | 100.1<br>(13.7) | 106.6<br>(11.2) | 87.7<br>(29.7)  | 106.2<br>(24.4) | 107.3<br>(10.0) |
| 2   | Albendazole                 | 89.0<br>(8.9)                  | 104.1<br>(3.9)  | 95.6<br>(6.4)   | 89.0<br>(10.0)  | 104.1<br>(3.7)  | 95.6<br>(6.7)   | 80.0<br>(9.0)   | 95.8<br>(1.3)   | 101.0<br>(6.7)  | 111.2<br>(4.6)  | 114.7<br>(2.8)  | 107.9<br>(5.6)  |
| 3   | Albendazole sulfoxide       | 111.8<br>(8.2)                 | 102.7<br>(3.3)  | 96.6<br>(4.2)   | 99.1<br>(10.4)  | 104.3<br>(10.2) | 101.2<br>(7.2)  | 110.4<br>(3.0)  | 107.6<br>(3.2)  | 98.4<br>(1.8)   | 116.2<br>(6.4)  | 103.8<br>(10.6) | 92.7<br>(5.2)   |
| 4   | Albendazole sulfone         | 112.1<br>(4.5)                 | 99.9<br>(3.3)   | 91.7<br>(3.5)   | 110.9<br>(8.2)  | 107.1<br>(1.5)  | 101.4<br>(4.2)  | 97.1<br>(11.2)  | 110.4<br>(1.7)  | 112.5<br>(4.5)  | 109.6<br>(7.0)  | 101.2<br>(6.2)  | 102.3<br>(5.3)  |
| 5   | 2-Amino albendazole sulfone | 112.1<br>(4.5)                 | 99.9<br>(3.3)   | 91.7<br>(3.5)   | 110.9<br>(8.2)  | 107.1<br>(1.5)  | 101.4<br>(4.2)  | 97.1<br>(11.2)  | 110.4<br>(1.7)  | 112.5<br>(4.5)  | 109.6<br>(7.0)  | 101.2<br>(6.2)  | 102.3<br>(5.3)  |
| 6   | Arprinocid                  | 97.5<br>(4.6)                  | 97.0<br>(2.5)   | 97.3<br>(1.2)   | 94.5<br>(8.5)   | 98.1<br>(4.0)   | 97.3<br>(2.6)   | 92.8<br>(4.7)   | 99.9<br>(6.1)   | 98.7<br>(1.9)   | 97.9<br>(2.6)   | 109.1<br>(7.3)  | 107.3<br>(4.9)  |
| 7   | Amprolium                   | 115.5<br>(19.6)                | 100.2<br>(7.8)  | 91.2<br>(12.1)  | 103.1<br>(7.9)  | 88.1<br>(3.6)   | 93.5<br>(6.0)   | 109.5<br>(6.0)  | 97.9<br>(14.1)  | 100.1<br>(4.8)  | 107.0<br>(9.9)  | 90.2<br>(4.4)   | 91.5<br>(7.3)   |
| 8   | Benznidazole                | 90.6<br>(8.5)                  | 103.8<br>(3.3)  | 103.5<br>(4.6)  | 94.2<br>(4.2)   | 95.5<br>(5.6)   | 96.2<br>(3.4)   | 95.6<br>(0.8)   | 93.8<br>(3.7)   | 97.9<br>(5.1)   | 91.4<br>(6.9)   | 98.8<br>(3.8)   | 101.1<br>(5.7)  |
| 9   | Bithionol                   | 96.0<br>(2.7)                  | 105.4<br>(2.9)  | 101.5<br>(2.8)  | 105.8<br>(29.8) | 93.4<br>(8.4)   | 95.0<br>(19.6)  | 102.0<br>(8.4)  | 104.5<br>(7.2)  | 98.0<br>(17.3)  | 117.7<br>(7.1)  | 117.7<br>(8.5)  | 119.4<br>(2.7)  |
| 10  | Buparvaquone                | 99.2<br>(2.5)                  | 109.0<br>(2.7)  | 108.3<br>(2.6)  | 110.4<br>(25.8) | 114.2<br>(23.2) | 87.9<br>(19.9)  | 105.5<br>(10.5) | 102.4<br>(3.1)  | 96.3<br>(5.1)   | 107.1<br>(20.7) | 94.4<br>(19.8)  | 102.9<br>(12.5) |
| 11  | Buquinolate                 | 88.7<br>(9.5)                  | 94.8<br>(15.3)  | 84.6<br>(9.6)   | 93.1<br>(10.2)  | 95.6<br>(17.9)  | 112.4<br>(10.5) | 90.1<br>(2.6)   | 103.8<br>(2.9)  | 99.7<br>(4.5)   | 107.8<br>(2.7)  | 113.4<br>(3.7)  | 114.8<br>(3.5)  |
| 12  | Cambendazole                | 108.6<br>(2.8)                 | 102.8<br>(4.9)  | 101.5<br>(3.0)  | 83.9<br>(4.2)   | 95.8<br>(4.8)   | 98.7<br>(2.2)   | 91.7<br>(7.6)   | 95.6<br>(4.2)   | 97.4<br>(1.0)   | 95.0<br>(3.8)   | 99.2<br>(3.2)   | 97.9<br>(1.7)   |
| 13  | Carbendazim                 | 95.0<br>(4.7)                  | 92.1<br>(6.6)   | 92.0<br>(1.8)   | 103.1<br>(7.8)  | 102.3<br>(5.3)  | 99.1<br>(5.8)   | 105.0<br>(8.0)  | 102.2<br>(4.6)  | 90.0<br>(3.8)   | 104.5<br>(8.4)  | 87.4<br>(4.4)   | 107.9<br>(2.0)  |
| 14  | Carnidazole                 | 106.7<br>(7.3)                 | 101.9<br>(1.7)  | 106.2<br>(0.8)  | 92.7<br>(4.8)   | 96.4<br>(3.4)   | 95.9<br>(2.5)   | 95.4<br>(8.7)   | 103.2<br>(3.0)  | 95.3<br>(4.5)   | 84.1<br>(7.9)   | 85.1<br>(13.8)  | 106.1<br>(8.5)  |
| 15  | Clopidol                    | 83.9<br>(7.0)                  | 95.7<br>(3.0)   | 101.3<br>(3.7)  | 84.8<br>(6.4)   | 97.4<br>(4.1)   | 99.6<br>(7.8)   | 97.2<br>(5.1)   | 99.8<br>(1.5)   | 98.8<br>(2.4)   | 94.6<br>(8.0)   | 96.1<br>(10.0)  | 103.7<br>(5.0)  |
| 16  | Clorsulon                   | 101.5<br>(23.5)                | 94.3<br>(7.1)   | 100.0<br>(5.5)  | 94.9<br>(16.9)  | 92.9<br>(18.9)  | 96.9<br>(6.0)   | 97.9<br>(12.1)  | 97.3<br>(9.2)   | 97.8<br>(7.6)   | 82.7<br>(15.8)  | 78.2<br>(7.5)   | 88.0<br>(6.3)   |

| Table 1. Efficacy of anthelmintic drugs against <i>Haemonchus contortus</i> (continued) |                            |                 |                 |                 |                 |                 |                 |                 |                |                 |                 |                 |                 |
|-----------------------------------------------------------------------------------------|----------------------------|-----------------|-----------------|-----------------|-----------------|-----------------|-----------------|-----------------|----------------|-----------------|-----------------|-----------------|-----------------|
| Drug                                                                                    | Study                      | Prevalence (%)  | Incidence (%)   | Prevalence (%)  | Incidence (%)   | Prevalence (%)  | Incidence (%)   | Prevalence (%)  | Incidence (%)  | Prevalence (%)  | Incidence (%)   | Prevalence (%)  | Incidence (%)   |
| 17                                                                                      | Closantel                  | 84.6<br>(28.3)  | 117.4<br>(22.9) | 111.9<br>(11.8) | 101.5<br>(18.1) | 96.0<br>(7.8)   | 100.3<br>(13.6) | 112.2<br>(2.9)  | 104.6<br>(4.5) | 97.8<br>(9.2)   | 74.4<br>(23.0)  | 77.3<br>(27.5)  | 89.8<br>(19.3)  |
| 18                                                                                      | Cymiazole                  | 92.9<br>(9.8)   | 98.7<br>(8.5)   | 105.3<br>(5.1)  | 86.8<br>(6.6)   | 93.8<br>(6.1)   | 94.5<br>(3.3)   | 95.1<br>(5.4)   | 97.7<br>(3.2)  | 90.3<br>(7.2)   | 111.3<br>(4.7)  | 113.5<br>(2.6)  | 105.8<br>(5.1)  |
| 19                                                                                      | Decoquinat                 | 85.5<br>(5.1)   | 77.5<br>(7.4)   | 81.1<br>(6.1)   | 99.4<br>(16.5)  | 86.0<br>(22.9)  | 113.1<br>(19.7) | 76.4<br>(23.2)  | 100.3<br>(7.7) | 102.2<br>(9.4)  | 109.5<br>(9.7)  | 99.7<br>(6.0)   | 107.1<br>(10.0) |
| 20                                                                                      | Diaveridine                | 96.9<br>(4.0)   | 99.1<br>(3.2)   | 100.9<br>(1.6)  | 91.3<br>(2.7)   | 101.1<br>(3.4)  | 102.0<br>(3.4)  | 87.4<br>(6.9)   | 97.2<br>(7.3)  | 103.4<br>(1.9)  | 95.9<br>(1.7)   | 100.7<br>(3.9)  | 106.7<br>(7.7)  |
| 21                                                                                      | Diclazuril                 | 87.5<br>(26.6)  | 107.7<br>(4.4)  | 100.3<br>(5.6)  | 67.4<br>(16.6)  | 101.3<br>(11.8) | 98.6<br>(16.1)  | 76.6<br>(20.7)  | 96.9<br>(1.7)  | 98.4<br>(5.3)   | 107.5<br>(7.4)  | 114.4<br>(7.4)  | 106.2<br>(7.3)  |
| 22                                                                                      | Dicyclanil                 | 95.9<br>(17.1)  | 97.8<br>(20.2)  | 103.3<br>(3.0)  | 118.0<br>(13.0) | 112.9<br>(7.5)  | 110.7<br>(7.2)  | 104.8<br>(13.0) | 93.9<br>(5.1)  | 96.2<br>(4.9)   | 101.8<br>(8.7)  | 85.2<br>(4.7)   | 104.3<br>(8.4)  |
| 23                                                                                      | Diethylcarbamazine         | 103.2<br>(13.0) | 88.3<br>(8.1)   | 89.5<br>(9.4)   | 114.9<br>(8.4)  | 107.4<br>(3.3)  | 91.7<br>(1.7)   | 104.2<br>(4.1)  | 96.1<br>(9.7)  | 97.4<br>(12.6)  | 92.5<br>(2.8)   | 98.7<br>(6.7)   | 103.7<br>(5.0)  |
| 24                                                                                      | Doramectin                 | 91.4<br>(16.5)  | 117.3<br>(11.7) | 114.4<br>(14.6) | 82.2<br>(25.3)  | 109.3<br>(22.1) | 117.8<br>(13.2) | 113.9<br>(26.6) | 103.7<br>(6.1) | 109.2<br>(6.5)  | 99.1<br>(7.4)   | 106.0<br>(18.0) | 107.3<br>(11.0) |
| 25                                                                                      | Enamectin                  | 85.7<br>(13.0)  | 90.4<br>(8.9)   | 86.4<br>(9.6)   | 87.7<br>(12.2)  | 107.9<br>(16.4) | 110.9<br>(9.6)  | 90.5<br>(5.9)   | 108.3<br>(4.2) | 102.4<br>(4.2)  | 90.4<br>(11.7)  | 100.6<br>(9.6)  | 108.6<br>(4.9)  |
| 26                                                                                      | Ethopabate                 | 103.4<br>(4.9)  | 102.7<br>(1.8)  | 102.4<br>(3.0)  | 112.9<br>(7.7)  | 108.4<br>(4.7)  | 99.0<br>(6.3)   | 101.7<br>(7.5)  | 101.8<br>(2.6) | 94.2<br>(4.4)   | 105.4<br>(2.7)  | 106.6<br>(2.9)  | 105.3<br>(2.3)  |
| 27                                                                                      | Febantel                   | 93.1<br>(12.5)  | 103.7<br>(4.7)  | 92.6<br>(6.3)   | 86.8<br>(13.6)  | 94.8<br>(6.3)   | 93.5<br>(4.3)   | 98.8<br>(4.1)   | 100.5<br>(8.3) | 100.5<br>(4.7)  | 80.1<br>(12.1)  | 92.9<br>(21.3)  | 108.9<br>(4.9)  |
| 28                                                                                      | Fenbendazole               | 113.2<br>(2.3)  | 110.0<br>(5.4)  | 93.5<br>(6.7)   | 108.3<br>(10)   | 105.2<br>(14)   | 101.6<br>(11.7) | 80.7<br>(4.5)   | 103.8<br>(2.7) | 92.8<br>(17.5)  | 75.3<br>(27.3)  | 88.7<br>(15.7)  | 103.0<br>(4.1)  |
| 29                                                                                      | Fluazuron                  | 89.9<br>(12.7)  | 100.8<br>(9.5)  | 97.8<br>(7.1)   | 105.1<br>(15.4) | 97.4<br>(7.8)   | 104.4<br>(15.2) | 99.1<br>(10.2)  | 97.3<br>(3.0)  | 103.7<br>(10.3) | 118.6<br>(16.0) | 93.3<br>(9.2)   | 68.9<br>(7.4)   |
| 30                                                                                      | Flubendazole               | 100.9<br>(4.8)  | 105.3<br>(2.5)  | 93.4<br>(10.4)  | 106.1<br>(8.9)  | 100.4<br>(7.1)  | 86.3<br>(4.0)   | 89.6<br>(7.8)   | 100.1<br>(6.4) | 90.9<br>(6.0)   | 109.6<br>(7.4)  | 118.6<br>(6.3)  | 106.5<br>(5.9)  |
| 31                                                                                      | 2-Amino flubendazole       | 96.8<br>(5.2)   | 99.1<br>(6.9)   | 101.0<br>(5.7)  | 80.4<br>(20.3)  | 104.8<br>(9.9)  | 100.5<br>(14.1) | 101.7<br>(2.7)  | 104.8<br>(7.5) | 97.2<br>(3.7)   | 113.6<br>(4.7)  | 108.4<br>(3.7)  | 109.8<br>(5.2)  |
| 32                                                                                      | Halofuginone               | 111.8<br>(7.9)  | 108.3<br>(7.7)  | 97.4<br>(8.3)   | 105<br>(16.3)   | 107.9<br>(8.5)  | 97.0<br>(4.8)   | 108.7<br>(1.2)  | 97.0<br>(4.3)  | 94.7<br>(9.5)   | 106.7<br>(11.1) | 99.0<br>(11.0)  | 109.7<br>(8.4)  |
| 33                                                                                      | Imidocarb                  | 96.6<br>(8.2)   | 90.7<br>(10.1)  | 77.4<br>(11.6)  | 76.8<br>(15.7)  | 85.8<br>(5.9)   | 108.6<br>(2.3)  | 107.0<br>(9.3)  | 95.6<br>(12.1) | 107.2<br>(7.2)  | 114.3<br>(5.2)  | 110.5<br>(12.5) | 108.4<br>(6.8)  |
| 34                                                                                      | Ivermectin                 | 112.8<br>(12.5) | 102.5<br>(8.3)  | 100.5<br>(12.3) | 117.1<br>(15.5) | 105.5<br>(15.6) | 107.0<br>(20.4) | 83.1<br>(24.6)  | 93.1<br>(10.4) | 94.2<br>(7.1)   | 93.8<br>(14.2)  | 117.6<br>(8.9)  | 106.9<br>(4.1)  |
| 35                                                                                      | Levamisole                 | 109.7<br>(2.7)  | 102.5<br>(5.8)  | 97.7<br>(2.6)   | 96.8<br>(12.5)  | 93.9<br>(1.9)   | 94.0<br>(2.5)   | 100.0<br>(3.6)  | 98.8<br>(2.5)  | 86.2<br>(2.7)   | 94.9<br>(3.0)   | 110.5<br>(6.6)  | 111.3<br>(8.6)  |
| 36                                                                                      | Maduramycin                | 108.3<br>(20.2) | 109.1<br>(23.1) | 93.4<br>(17.9)  | 112.8<br>(28.6) | 116.6<br>(10.2) | 87.3<br>(16.5)  | 71.6<br>(22.7)  | 102.6<br>(8.7) | 94.1<br>(3.9)   | 86.9<br>(9.7)   | 115.8<br>(13.9) | 111.1<br>(8.3)  |
| 37                                                                                      | Mebendazole                | 106.1<br>(3.4)  | 95.1<br>(3.7)   | 98.9<br>(5.0)   | 84.7<br>(10.6)  | 95.7<br>(2.0)   | 97.6<br>(6.6)   | 95.1<br>(5.7)   | 96.8<br>(7.0)  | 98.0<br>(9.2)   | 105.0<br>(3.2)  | 102.4<br>(5.1)  | 104.5<br>(2.9)  |
| 38                                                                                      | Mebendazole amine          | 90.9<br>(8.6)   | 103.3<br>(1.6)  | 95.2<br>(3.1)   | 99.7<br>(8.9)   | 89.6<br>(11.9)  | 100.4<br>(5.1)  | 84.1<br>(5.9)   | 86.4<br>(10.8) | 95.6<br>(4.1)   | 95.0<br>(12.7)  | 100.2<br>(5.7)  | 105.8<br>(8.4)  |
| 39                                                                                      | 5-Hydroxy mebendazole      | 94.2<br>(9.0)   | 101.5<br>(1.9)  | 101.4<br>(2.2)  | 103.2<br>(3.9)  | 95.3<br>(3.5)   | 94.0<br>(2.0)   | 95.6<br>(6.4)   | 101.5<br>(4.4) | 97.1<br>(2.6)   | 101.0<br>(2.9)  | 95.5<br>(8.0)   | 104.1<br>(4.1)  |
| 40                                                                                      | Methylbenzoquate, Nequinat | 96.7<br>(14.4)  | 110.0<br>(14.4) | 106.2<br>(9.6)  | 96.9<br>(18.6)  | 119.4<br>(19.6) | 115.3<br>(14.8) | 97.5<br>(8.2)   | 102.7<br>(4.3) | 101.7<br>(1.6)  | 101.1<br>(10.4) | 111.1<br>(8.9)  | 108.3<br>(12.8) |
| 41                                                                                      | Metronidazole              | 117.4<br>(9.4)  | 104.1<br>(14.7) | 99.6<br>(6.9)   | 96.4<br>(11.3)  | 102.2<br>(4.4)  | 90.7<br>(4.4)   | 108.6<br>(9.9)  | 99.5<br>(8.4)  | 100.8<br>(15.9) | 86.1<br>(13.6)  | 102.5<br>(11.7) | 86.7<br>(11.8)  |
| 42                                                                                      | Monensin                   | 93.5<br>(19.1)  | 106.5<br>(12.7) | 105.6<br>(12.1) | 98.4<br>(24.4)  | 110.2<br>(12.4) | 107.1<br>(16.6) | 78.9<br>(15.1)  | 98.8<br>(4.9)  | 105.7<br>(5.6)  | 107.1<br>(12.2) | 93.1<br>(14.0)  | 114.9<br>(4.7)  |
| 43                                                                                      | Monepantel                 | 104.4<br>(19.8) | 113.4<br>(11.1) | 114.4<br>(9.9)  | 92.5<br>(10.7)  | 101.8<br>(11)   | 102.8<br>(6.6)  | 79.4<br>(12.1)  | 92.4<br>(5.9)  | 96.6<br>(8.1)   | 77.0<br>(14.7)  | 94.3<br>(16.2)  | 112.6<br>(6.9)  |
| 44                                                                                      | Monepantel-sulfone         | 97.3<br>(9.4)   | 107.3<br>(3.6)  | 104.2<br>(5.9)  | 81.1<br>(6.8)   | 107.0<br>(2.5)  | 110.9<br>(8.9)  | 69.5<br>(10.5)  | 98.9<br>(5.5)  | 103.6<br>(10.8) | 89.3<br>(2.0)   | 98.2<br>(7.9)   | 109.7<br>(4.2)  |
| 45                                                                                      | Morantel                   | 90.9<br>(4.1)   | 101.3<br>(3.7)  | 98.4<br>(2.4)   | 101.5<br>(3.2)  | 99.1<br>(2.4)   | 92.8<br>(1.5)   | 100.5<br>(5.0)  | 99.9<br>(4.7)  | 96.8<br>(1.0)   | 88.9<br>(6.6)   | 94.8<br>(5.9)   | 101.4<br>(5.3)  |
| 46                                                                                      | Narasin                    | 100.4<br>(7.4)  | 113.9<br>(20.3) | 108.7<br>(17.6) | 101.0<br>(30.2) | 99.4<br>(24.0)  | 87.4<br>(20.3)  | 84.0<br>(19.1)  | 93.9<br>(8.6)  | 105.7<br>(5.4)  | 82.9<br>(29.5)  | 88.0<br>(23.5)  | 103.7<br>(9.5)  |



|    |                         |                 |                 |                 |                 |                 |                 |                 |                 |                 |                 |                 |                 |
|----|-------------------------|-----------------|-----------------|-----------------|-----------------|-----------------|-----------------|-----------------|-----------------|-----------------|-----------------|-----------------|-----------------|
| 47 | Nicarbazin              | 90.4<br>(8.3)   | 101.8<br>(6.4)  | 88.7<br>(6.0)   | 109.1<br>(7.7)  | 93.2<br>(10.2)  | 110.2<br>(9.9)  | 107.9<br>(5.6)  | 114.2<br>(4.3)  | 101.4<br>(10.6) | 109.3<br>(10.6) | 87.5<br>(8.2)   | 110.1<br>(11.7) |
| 48 | Niclosamide             | 103.6<br>(18.0) | 119.5<br>(8.4)  | 99.4<br>(7.2)   | 108.6<br>(24.3) | 93.4<br>(16.9)  | 94.8<br>(14.3)  | 117.0<br>(7.1)  | 118.8<br>(4.8)  | 114.4<br>(9.0)  | 87.6<br>(11.5)  | 115.2<br>(26.0) | 112.6<br>(4.8)  |
| 49 | Nitroxinil              | 84.4<br>(3.3)   | 110.7<br>(2.2)  | 114.9<br>(12.3) | 68.4<br>(3.7)   | 102.8<br>(3.0)  | 111.1<br>(6.8)  | 78.3<br>(5.2)   | 106.5<br>(3.3)  | 92.4<br>(1.6)   | 72.1<br>(8.3)   | 94.1<br>(10.5)  | 113.0<br>(6.1)  |
| 50 | Ornidazole              | 99.6<br>(9.1)   | 98.8<br>(5.9)   | 97.2<br>(5.8)   | 93.7<br>(15.8)  | 89.4<br>(11.0)  | 94.9<br>(5.4)   | 101.0<br>(18)   | 101.5<br>(8.9)  | 92.4<br>(8.7)   | 117.9<br>(10.2) | 106.5<br>(5.7)  | 101.2<br>(5.9)  |
| 51 | Oxamniquine             | 91.5<br>(7.3)   | 101.4<br>(2.2)  | 102.6<br>(2.5)  | 105.4<br>(5.7)  | 100.3<br>(5.2)  | 92.3<br>(5.7)   | 94.7<br>(6.6)   | 105.5<br>(3.1)  | 96.7<br>(3.0)   | 104.4<br>(12.5) | 105.6<br>(6.1)  | 105.5<br>(8.0)  |
| 52 | Oxantel                 | 95.1<br>(3.5)   | 98.0<br>(2.8)   | 100.7<br>(2.4)  | 93.9<br>(4.6)   | 97.8<br>(3.2)   | 99.6<br>(4.8)   | 97.1<br>(2.0)   | 104.5<br>(2.6)  | 102.7<br>(1.6)  | 100.4<br>(2.6)  | 97.6<br>(5.9)   | 104.4<br>(1.8)  |
| 53 | Oxfendazole             | 100.7<br>(9.6)  | 95.7<br>(2.8)   | 97.7<br>(3.3)   | 109.8<br>(4.7)  | 101.7<br>(4.2)  | 100.6<br>(2.7)  | 89.0<br>(3.9)   | 95.3<br>(1.1)   | 96.6<br>(3.6)   | 116.0<br>(6.2)  | 99.5<br>(6.6)   | 98.6<br>(4.1)   |
| 54 | Oxfendazole sulfone     | 118.9<br>(4.4)  | 106.9<br>(1.6)  | 95.6<br>(5.0)   | 110.8<br>(4.2)  | 101.6<br>(4.1)  | 102.1<br>(1.9)  | 93.6<br>(3.4)   | 100.6<br>(4.8)  | 94.7<br>(4.6)   | 96.1<br>(2.5)   | 98.6<br>(8.9)   | 99.6<br>(5.2)   |
| 55 | Oxibendazole            | 74.5<br>(22.3)  | 118.7<br>(4.8)  | 119.0<br>(4.0)  | 83.8<br>(10.6)  | 107.1<br>(2.1)  | 105.7<br>(6.4)  | 94.0<br>(5.0)   | 99.1<br>(5.2)   | 94.9<br>(2.8)   | 98.8<br>(6.0)   | 100.6<br>(4.3)  | 110.4<br>(4.0)  |
| 56 | Oxyclozanide            | 80.9<br>(18.2)  | 110.2<br>(11.5) | 111.7<br>(9.8)  | 60.7<br>(6.0)   | 102.1<br>(12.6) | 96.3<br>(13.4)  | 68.6<br>(24.3)  | 105.1<br>(1.3)  | 101.5<br>(11.2) | 91.6<br>(9.6)   | 115.9<br>(11.5) | 98.4<br>(11.3)  |
| 57 | Praziquantel            | 105.5<br>(7.1)  | 106.4<br>(2.4)  | 102.6<br>(4.5)  | 101.6<br>(8.8)  | 100.9<br>(4.8)  | 107.0<br>(5.4)  | 95.6<br>(1.4)   | 96.7<br>(4.9)   | 95.4<br>(2.5)   | 109.3<br>(2.7)  | 103.4<br>(11.5) | 110.2<br>(2.8)  |
| 58 | Pyrantel                | 97.7<br>(4.3)   | 96.4<br>(2.1)   | 93.6<br>(3.0)   | 111.9<br>(4.4)  | 101.5<br>(4.5)  | 96.3<br>(3.7)   | 97.8<br>(4.0)   | 98.9<br>(2.3)   | 93.2<br>(2.7)   | 102.5<br>(3.3)  | 102.2<br>(2.1)  | 103.1<br>(2.9)  |
| 59 | Salinomycin             | 117.5<br>(5.3)  | 113.5<br>(14.3) | 107.1<br>(18.8) | 96.7<br>(28.6)  | 100.2<br>(17.7) | 80.1<br>(17.6)  | 78.7<br>(26.3)  | 91.9<br>(7.6)   | 109.2<br>(7.3)  | 66.9<br>(8.8)   | 85.5<br>(27.0)  | 101.4<br>(16.7) |
| 60 | Semduramicin            | 79.8<br>(16.8)  | 108.0<br>(18.3) | 99.8<br>(15.3)  | 88.6<br>(19.4)  | 104.0<br>(14.4) | 113.0<br>(15.4) | 74.0<br>(12.9)  | 95.4<br>(6.4)   | 101.2<br>(3.7)  | 95.9<br>(15.2)  | 113.3<br>(19.7) | 113.1<br>(3.9)  |
| 61 | Ternidazole             | 98.4<br>(8.6)   | 97.6<br>(2.5)   | 102.6<br>(4.8)  | 88<br>(7.5)     | 101.7<br>(7.0)  | 101.3<br>(10.3) | 101.2<br>(7.0)  | 110.9<br>(4.7)  | 100.6<br>(6.3)  | 85.8<br>(19.6)  | 99.5<br>(5.2)   | 99.6<br>(3.4)   |
| 62 | Tetramisole             | 106.6<br>(2.6)  | 101.4<br>(3.7)  | 101.0<br>(4.5)  | 104.9<br>(3.4)  | 103.7<br>(3.2)  | 96.3<br>(4.3)   | 84.5<br>(4.4)   | 92.3<br>(3.2)   | 91.6<br>(8.6)   | 84.8<br>(5.4)   | 109.3<br>(8.2)  | 110.7<br>(7.3)  |
| 63 | Thiabendazole           | 78.6<br>(8.8)   | 92.7<br>(5.7)   | 100.0<br>(5.7)  | 67.0<br>(10.7)  | 91.5<br>(4.0)   | 98.6<br>(5.3)   | 77.1<br>(6.6)   | 94.4<br>(3.3)   | 99.2<br>(3.4)   | 102.6<br>(4.9)  | 102.6<br>(5.1)  | 103.8<br>(3.5)  |
| 64 | 5-Hydroxy thiabendazole | 117.1<br>(17.6) | 101.4<br>(12.2) | 96.8<br>(15.5)  | 85.1<br>(17.2)  | 106.3<br>(7.2)  | 100.2<br>(6.7)  | 104.2<br>(7.6)  | 99.1<br>(8.6)   | 110.6<br>(6.0)  | 83.3<br>(4.1)   | 105.3<br>(8.3)  | 102.7<br>(10.9) |
| 65 | Thiophanate             | 93.5<br>(14.3)  | 119.6<br>(5.5)  | 119.9<br>(17.8) | 86.1<br>(17.9)  | 70.7<br>(24.6)  | 73.9<br>(12.7)  | 101.9<br>(8.1)  | 91.0<br>(12.9)  | 85.6<br>(8.6)   | 86.1<br>(9.7)   | 86.1<br>(21.1)  | 104.3<br>(16.2) |
| 66 | Tinidazole              | 99.1<br>(18.0)  | 86.0<br>(11.2)  | 86.6<br>(6.4)   | 84.1<br>(12.9)  | 92.0<br>(9.5)   | 100.8<br>(4.5)  | 101.1<br>(14.0) | 85.3<br>(13.3)  | 97.8<br>(7.9)   | 107.1<br>(19.0) | 99.9<br>(4.3)   | 95.1<br>(8.8)   |
| 67 | Toltrazuril sulfone     | 86.2<br>(9.4)   | 98.7<br>(9.0)   | 104.2<br>(4.6)  | 101.1<br>(5.4)  | 103.6<br>(11.3) | 102.8<br>(4.5)  | 93.1<br>(14.4)  | 100.4<br>(1.6)  | 95.6<br>(3.7)   | 89.7<br>(4.7)   | 101.6<br>(14.4) | 103.5<br>(6.8)  |
| 68 | Trichlorfon             | 106.0<br>(6.9)  | 94.3<br>(8.3)   | 97.4<br>(10.2)  | 81.2<br>(19.2)  | 87.6<br>(11.9)  | 89.6<br>(8.3)   | 104.9<br>(13.7) | 91.1<br>(5.8)   | 94.0<br>(3.9)   | 112.3<br>(9.6)  | 101.3<br>(12.6) | 104.7<br>(9.7)  |
| 69 | Triclabendazole         | 114.8<br>(10.9) | 117.0<br>(7.6)  | 108.4<br>(11.9) | 92.2<br>(8.7)   | 108.2<br>(12.8) | 101.7<br>(8.8)  | 97.0<br>(11.8)  | 112.2<br>(10.5) | 108.6<br>(9.1)  | 110.4<br>(24.9) | 106.9<br>(20.7) | 116.6<br>(22.2) |
| 70 | Keto triclabendazole    | 98.3<br>(27.6)  | 118.9<br>(8.9)  | 106.2<br>(14.3) | 60.5<br>(27.8)  | 102.8<br>(18.2) | 99.9<br>(19.0)  | 88.2<br>(20.6)  | 95.5<br>(7.3)   | 96.1<br>(6.5)   | 105.1<br>(21.2) | 96.0<br>(12.3)  | 108.7<br>(8.0)  |
| 71 | Zoalene                 | 101.8<br>(6.1)  | 113.1<br>(7.7)  | 110.1<br>(16.9) | 108.1<br>(5.6)  | 96.8<br>(8.3)   | 86.7<br>(17.6)  | 90.1<br>(17.8)  | 100.9<br>(14.2) | 103.5<br>(9.7)  | 119.4<br>(15.5) | 93.2<br>(18.2)  | 101.6<br>(6.8)  |

<sup>a</sup>Coefficient value (CV) <sup>b</sup>Validation level C1, C2 and C3: 1, 2 and 10 µg kg<sup>-1</sup> for metronidazole and 5, 10 and 20 µg kg<sup>-1</sup> for all other analytes.

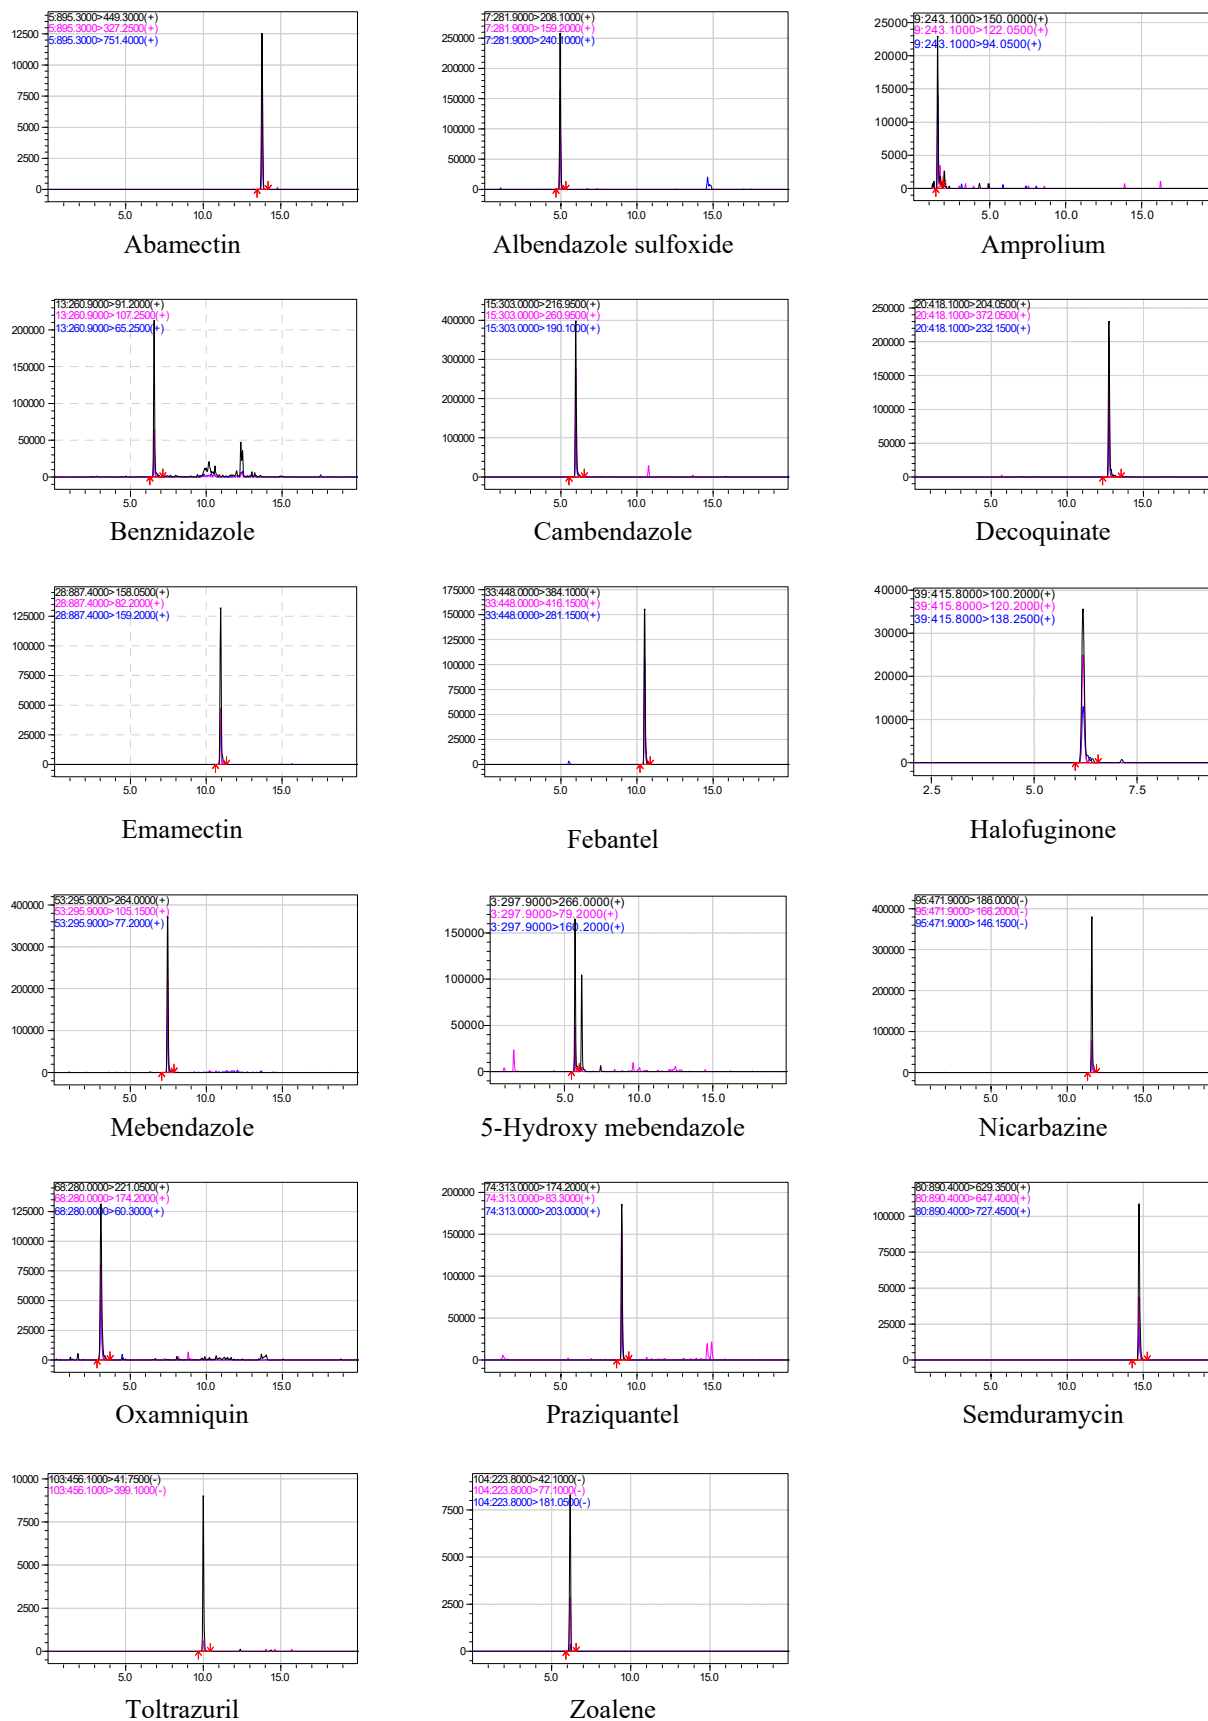

**Figure S1.** Representative chromatograms in flatfish at the spiking levels of 10 µg kg<sup>-1</sup>.
